# Supplementary material for: Intestinal epithelial N-acylphosphatidylethanolamine phospholipase D links dietary fat to metabolic adaptations in obesity and steatosis
Source: PubMed Central journal article supplement (PMC6349942; doi:10.1038/s41467-018-08051-7), 2019-01-28
Supplement: 41467_2018_8051_MOESM1_ESM.pdf [file 41467_2018_8051_MOESM1_ESM.pdf]

## **Supplementary information**

**Intestinal epithelial N-acylphosphatidylethanolamine phospholipase D links dietary fat to metabolic adaptations in obesity and steatosis**

**Everard, Plovier, Rastelli et al.**

## Supplementary Figures

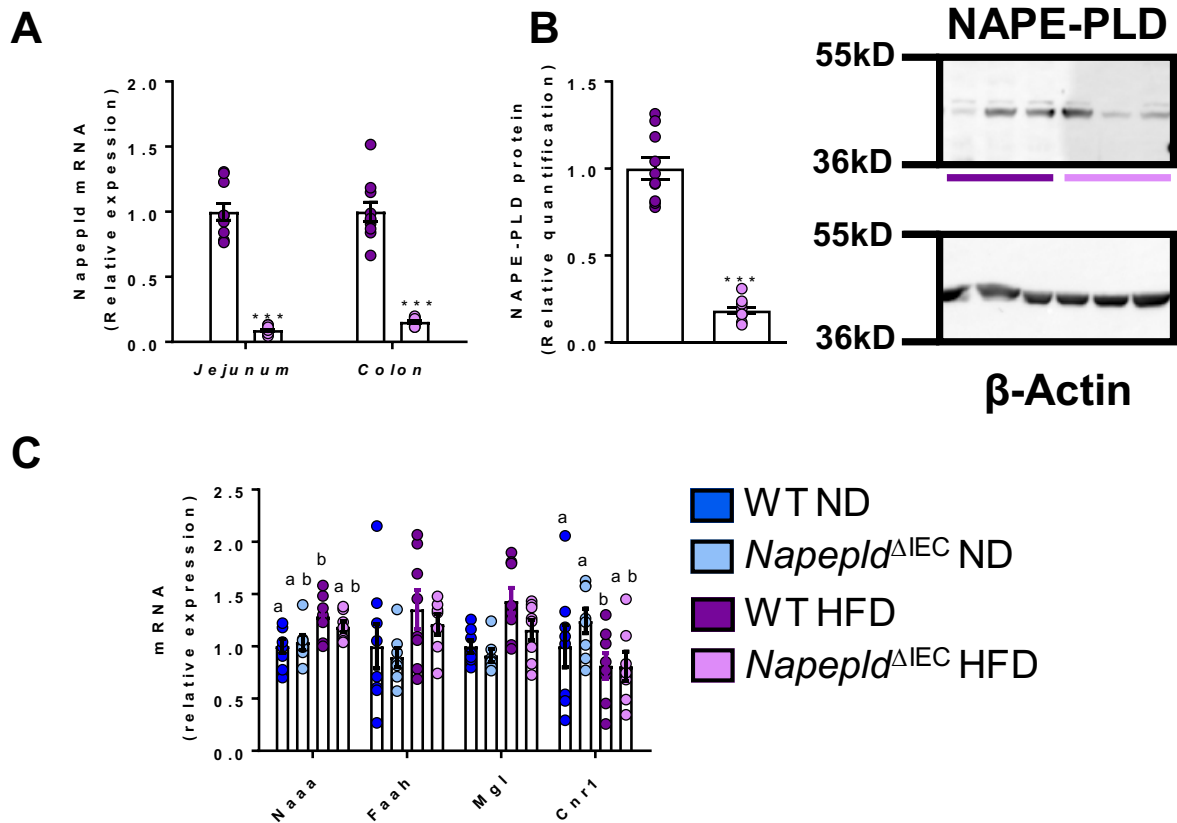

**Supplementary Figure 1: Validation of IEC *Napepld* deletion under HFD. Related to Figure 1.** A) *Napepld* mRNA expression in the jejunum, colon in HFD-fed WT and *Napepld* <sup>$\Delta$ IEC</sup> mice (n = 8-10). B) NAPE-PLD protein levels in the colon. Representative western-blot of NAPE-PLD and  $\beta$ -Actin (n = 9-10). Relative mRNA expression of *NAAA*, *Faah*, *Mgl*, and *Cnr1* in the ileum of WT and *Napepld* <sup>$\Delta$ IEC</sup> mice either fed with ND or HFD for 8weeks (n = 8). Data are presented as the mean  $\pm$  s.e.m. ‘\*\*\*’ indicates a significant difference versus WT HFD (P<0.001) according to Mann-Whitney test. Data with different superscript letters are significantly different (P<0.05) according to regular two-way ANOVA followed by Tukey’s post-hoc test.

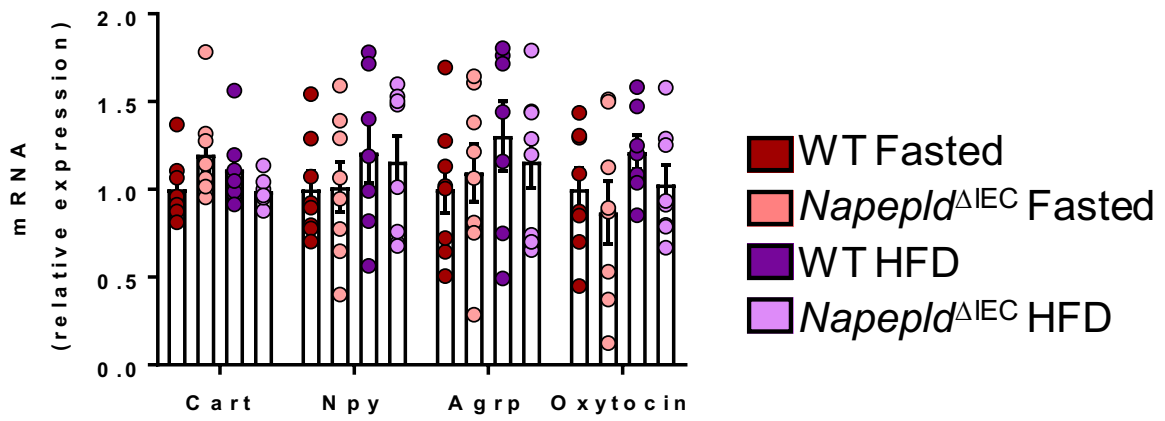

**Supplementary Figure 2: Consequences of IEC *Napepld* deletion on the expression of genes regulating food intake. Related to Figure 3.** mRNA expression of genes (*Cart*, *Npy*, *Agrp*, *Oxytocin*) involved in the regulation of food intake in the hypothalamus (n = 7-8). Data are presented as the mean  $\pm$  s.e.m.

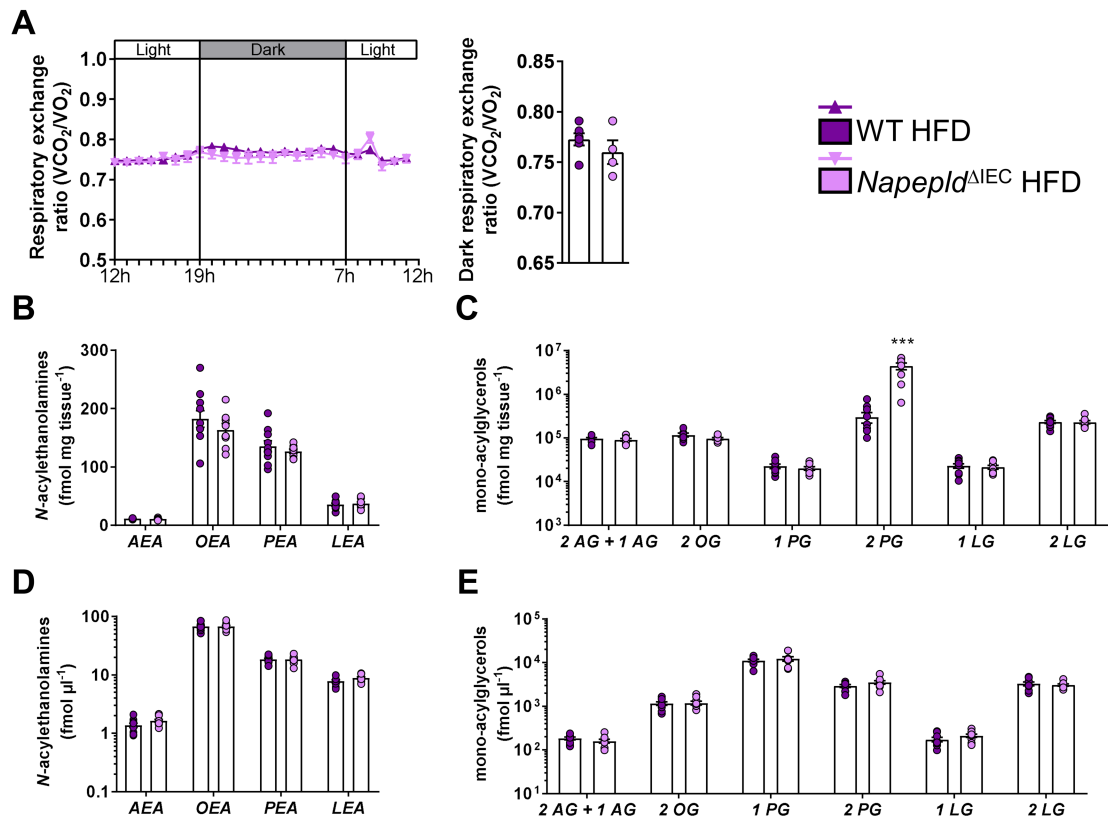

**Supplementary Figure 3: Respiratory exchange ratio and intestinal and portal plasma *N*-acylethanolamines and mono-acylglycerols at the end of 16 weeks HFD. Related to Figure 5.** A) Light and dark cycle of respiratory exchange ratio ( $V_{CO_2}/V_{O_2}$ ) ( $n = 4-6$ ). B) *N*-acylethanolamines (fmol mg tissue<sup>-1</sup>) measured in the jejunum ( $n=8-10$ ). C) mono-acylglycerols (AG= 1AG+2AG) (fmol mg tissue<sup>-1</sup>) measured in the jejunum ( $n=8-10$ ). D) *N*-acylethanolamines (fmol  $\mu$ l<sup>-1</sup>) measured in the portal vein ( $n=9-10$ ). E) mono-acylglycerols (AG= 1AG+2AG) (fmol  $\mu$ l<sup>-1</sup>) measured in the portal vein ( $n=8-10$ ). Data are presented as the mean  $\pm$  s.e.m. '\*\*\*' indicate a significant difference versus WT HFD ( $P<0.001$ ) according to Mann-Whitney test.

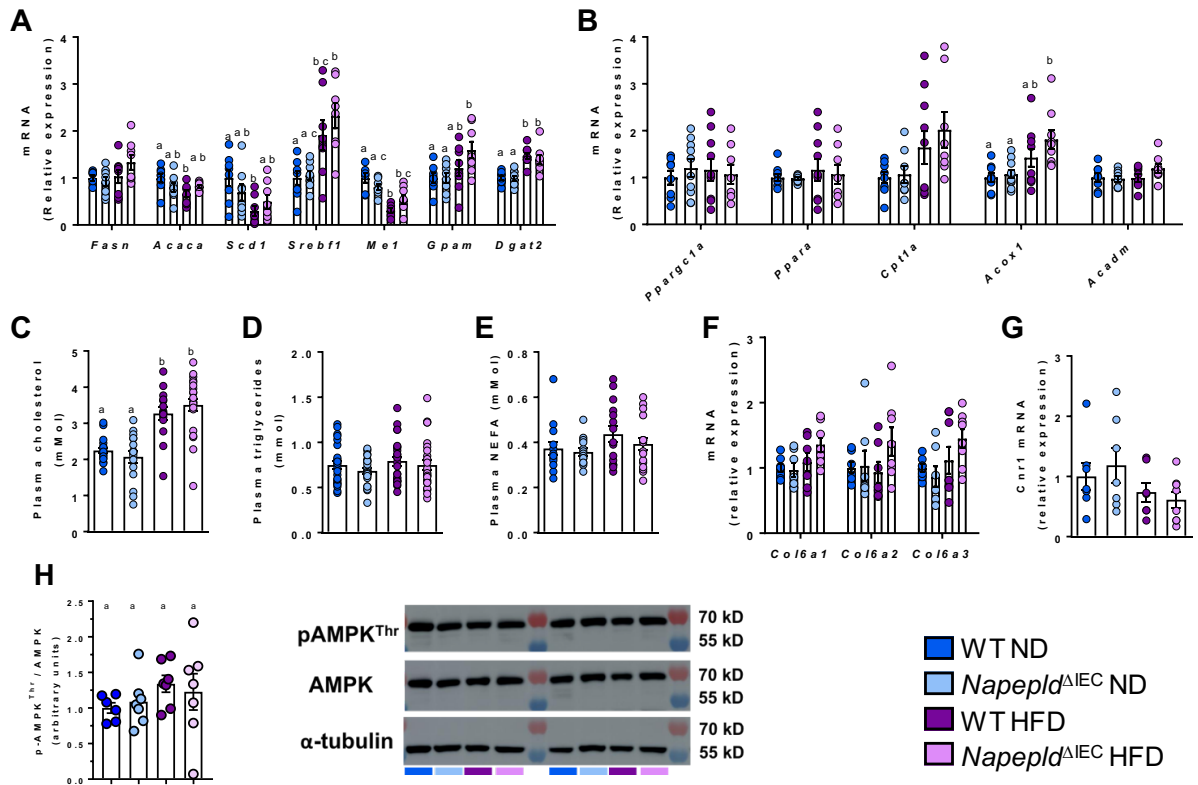

**Supplementary Figure 4: Effects of IEC *Napepld* deletion on liver gene expression and on circulating lipids. Related to Figure 6.** A) mRNA expression of genes involved in fatty acid synthesis in the liver (n = 7-8). B) mRNA expression of genes involved in fatty acid oxidation in the liver (n = 8). C) Plasma cholesterol levels (mMol, n = 15-21). D) Plasma triglycerides levels (mMol, n = 26-28). E) Plasma non-esterified fatty acids levels (mMol, n = 14-16). F) mRNA expression of genes encoding collagen fibers in the liver (n = 7-8). G) mRNA expression of *Cnr1* in the liver (n = 7-8). H) Representative western-blot of AMPK (62 kDa), p-AMPK<sup>Thr172</sup> (62 kDa) and α-tubulin (50 kDa) (n = 6-7). Data are presented as the mean ± s.e.m. Data with different superscript letters are significantly different (P<0.05) according to regular two-way ANOVA followed by Tukey's post-hoc test.

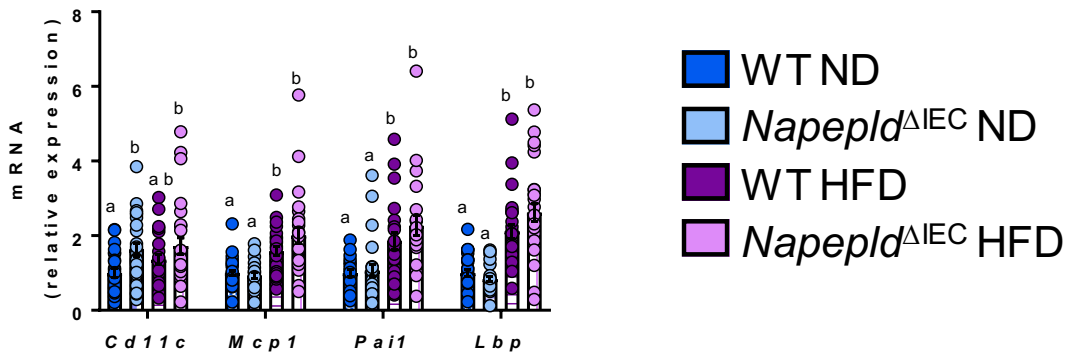

**Supplementary Figure 5: Effects of IEC *Napepld* deletion on adipose tissue inflammation.** mRNA expression of inflammatory markers in the visceral adipose tissue (n = 25-27). Data are presented as the mean  $\pm$  s.e.m. Data with different superscript letters are significantly different (P<0.05) according to regular two-way ANOVA followed by Tukey's post-hoc test.

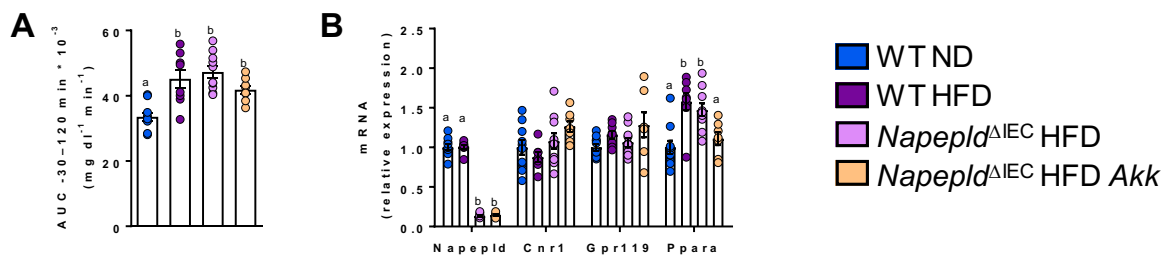

**Supplementary Figure 6: Effects of *A. muciniphila* on glucose tolerance and gene expression related to the NAE in HFD-fed *Napepld*<sup>ΔIEC</sup> mice. Related to Figure 9. A) Mean area under the curve (AUC, mg dl<sup>-1</sup> min<sup>-1</sup> 10<sup>-3</sup>) measured between 30 minutes before and 120 min after glucose loading (n=8-10). B) mRNA expression of *Napepld*, *Cnr1*, *Gpr119* and *Ppara* in the ileum (n=7-10). Data are presented as the mean  $\pm$  s.e.m. Data with different superscript letters are significantly different (P<0.05) according to regular two-way ANOVA followed by Tukey's post-hoc test.**

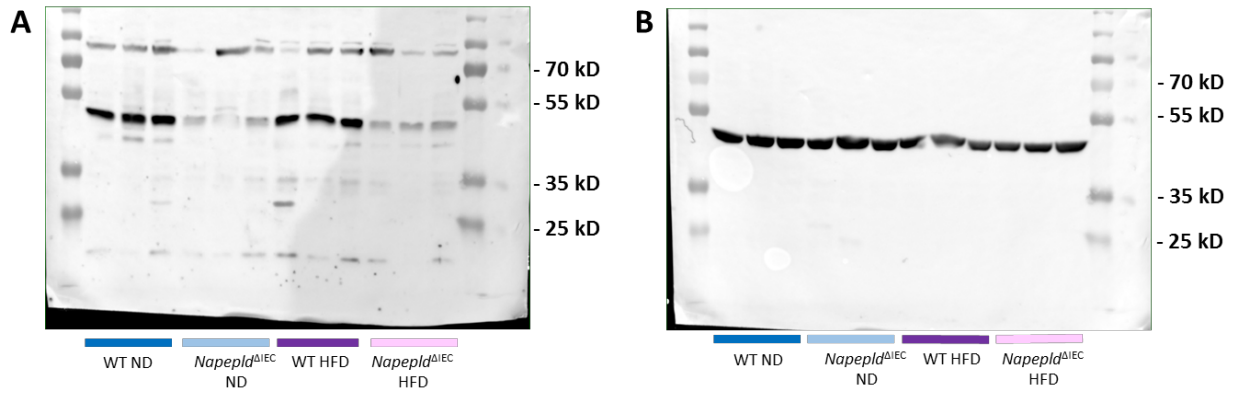

**Supplementary Figure 7:** Uncropped scans of the western blot presented in Fig. 1B and in Supplementary Figure 1. (A) NAPE-PLD and (B)  $\beta$ -actin.

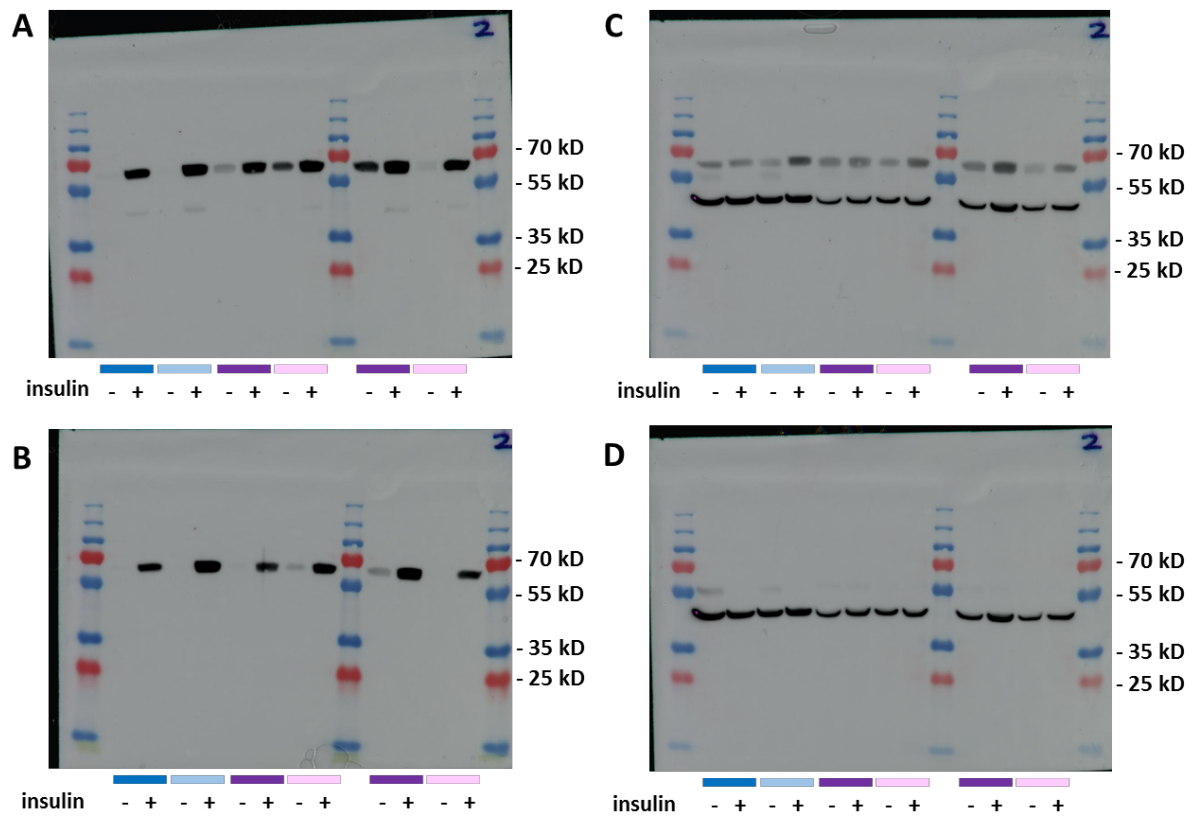

**Supplementary Figure 8:** Uncropped scans of the western blot presented in Fig. 7. (A) p-AKT<sup>Ser473</sup>, (B) p-AKT<sup>Thr308</sup>, (C) non phosphorylated AKT; the band at 42 kD on blot C corresponds to the remaining of  $\beta$ -actin which was detected previously to AKT; (D)  $\beta$ -actin.

WT ND in dark blue , *Napepld* <sup>$\Delta$ IEC</sup> ND in light blue, WT HFD in purple, *Napepld* <sup>$\Delta$ IEC</sup> HFD in pink.

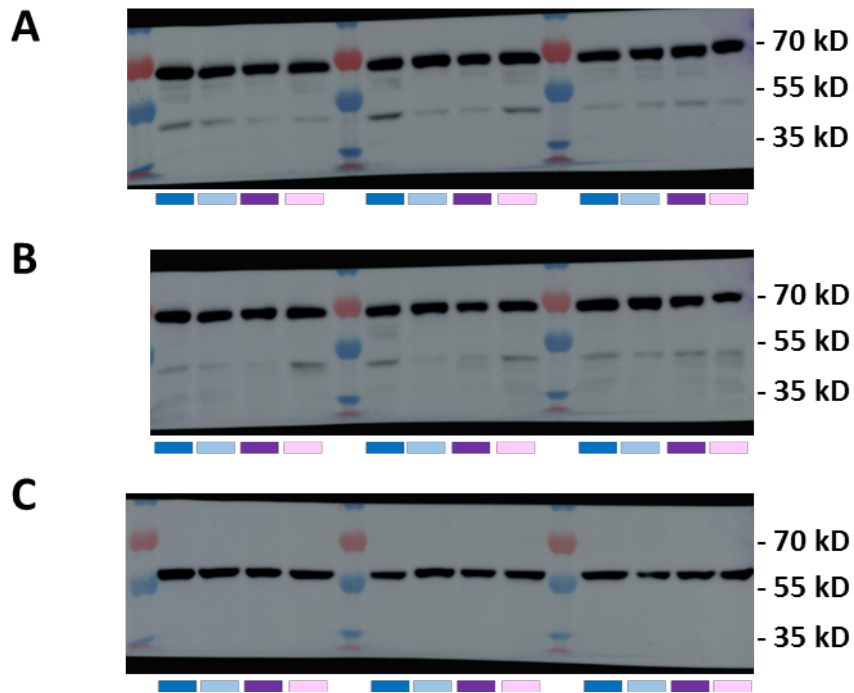

**Supplementary Figure 9:** Uncropped scans of the western blot in Supplementary Figure 4. **(A)** p-AMPK<sup>Thr172</sup>, **(B)** non phosphorylated AMPK and **(C)** α-tubulin . The blot is cut at 100kDa. WT ND in dark blu , *Napepld*<sup>ΔIEC</sup> ND in light blue, WT HFD in purple, *Napepld*<sup>ΔIEC</sup> HFD in pink.



**Supplementary Table 1: Relative abundance of the bacterial phyla found in the different groups (% of 16S rRNA sequences), Related to Figure 5**

|                        | WT ND |      | <i>Napepld</i> <sup>ΔIEC</sup> ND |      | Changes (%) | p-value       |
|------------------------|-------|------|-----------------------------------|------|-------------|---------------|
|                        | Mean  | SEM  | Mean                              | SEM  |             |               |
| <b>Actinobacteria</b>  | 0,04  | 0,02 | 0,03                              | 0,01 | -15,77      | 0,7835        |
| <b>Bacteroidetes</b>   | 29,91 | 2,49 | 35,56                             | 2,27 | 18,89       | 0,1113        |
| <b>Cyanobacteria</b>   | 0,11  | 0,03 | 0,10                              | 0,04 | -5,48       | 0,9162        |
| <b>Deferribacteres</b> | 4,53  | 1,06 | 4,20                              | 0,79 | -7,14       | 0,8068        |
| <b>Firmicutes</b>      | 56,83 | 1,89 | 50,39                             | 2,41 | -11,33      | 0,0543        |
| <b>kTM7</b>            | 0,05  | 0,02 | 0,01                              | 0,00 | -89,20      | 0,0539        |
| <b>Proteobacteria</b>  | 5,90  | 0,38 | 7,59                              | 0,51 | 28,53       | <b>0,0183</b> |
| <b>Tenericutes</b>     | 1,48  | 0,56 | 1,13                              | 0,28 | -23,42      | 0,5791        |
| <b>Unassigned</b>      | 1,16  | 0,13 | 0,99                              | 0,09 | -14,83      | 0,2852        |

  

|                        | WT ND |      | WT HFD |      | Changes (%) | p-value        |
|------------------------|-------|------|--------|------|-------------|----------------|
|                        | Mean  | SEM  | Mean   | SEM  |             |                |
| <b>Actinobacteria</b>  | 0,04  | 0,02 | 0,01   | 0,00 | -82,16      | 0,1056         |
| <b>Bacteroidetes</b>   | 29,91 | 2,49 | 30,54  | 1,22 | 2,12        | 0,8165         |
| <b>Cyanobacteria</b>   | 0,11  | 0,03 | 0,05   | 0,02 | -52,02      | 0,1302         |
| <b>Deferribacteres</b> | 4,53  | 1,06 | 1,74   | 0,27 | -61,68      | <b>0,0154</b>  |
| <b>Firmicutes</b>      | 56,83 | 1,89 | 58,71  | 1,12 | 3,31        | 0,3930         |
| <b>kTM7</b>            | 0,05  | 0,02 | 0,00   | 0,00 | WT ND       | <b>0,0309</b>  |
| <b>Proteobacteria</b>  | 5,90  | 0,38 | 8,05   | 0,32 | 36,32       | <b>0,0004*</b> |
| <b>Tenericutes</b>     | 1,48  | 0,56 | 0,10   | 0,03 | -93,05      | <b>0,0196</b>  |
| <b>Unassigned</b>      | 1,16  | 0,13 | 0,80   | 0,09 | -30,76      | <b>0,0401</b>  |

  

|                        | WT HFD |      | <i>Napepld</i> <sup>ΔIEC</sup> HFD |      | Changes (%)                        | p-value |
|------------------------|--------|------|------------------------------------|------|------------------------------------|---------|
|                        | Mean   | SEM  | Mean                               | SEM  |                                    |         |
| <b>Actinobacteria</b>  | 0,01   | 0,00 | 0,01                               | 0,00 | -14,27                             | 0,85725 |
| <b>Bacteroidetes</b>   | 30,54  | 1,22 | 26,64                              | 1,93 | -12,77                             | 0,10546 |
| <b>Cyanobacteria</b>   | 0,05   | 0,02 | 0,03                               | 0,02 | -42,87                             | 0,42838 |
| <b>Deferribacteres</b> | 1,74   | 0,27 | 2,48                               | 0,47 | 43,04                              | 0,18467 |
| <b>Firmicutes</b>      | 58,71  | 1,12 | 61,77                              | 2,15 | 5,21                               | 0,22312 |
| <b>kTM7</b>            | 0,00   | 0,00 | 0,01                               | 0,01 | <i>Napepld</i> <sup>ΔIEC</sup> HFD | 0,10287 |
| <b>Proteobacteria</b>  | 8,05   | 0,32 | 8,17                               | 0,49 | 1,57                               | 0,83047 |
| <b>Tenericutes</b>     | 0,10   | 0,03 | 0,08                               | 0,04 | -19,32                             | 0,67611 |
| <b>Unassigned</b>      | 0,80   | 0,09 | 0,80                               | 0,08 | 0,02                               | 0,99900 |

All phyla detected by pyrosequencing are presented in the tables. Indication WT ND or *Napepld*<sup>ΔIEC</sup> HFD in the column 'changes (%)' corresponds to the group of mice for which the given phylotype was found exclusively. P-values are based on Student *t*-test. u=unclassified. Significant P-values (≤0.05 are indicated in red). \*: significant p-values after FDR correction.

**Supplementary Table 2: Relative abundance of the bacterial families found in the different groups (% of 16S rRNA sequences), Related to Figure 5**

|                     | WT ND  |       | <i>Napepld</i> <sup>ΔIEC</sup> ND |       | Changes (%)                       | p-value       |
|---------------------|--------|-------|-----------------------------------|-------|-----------------------------------|---------------|
|                     | Mean   | SEM   | Mean                              | SEM   |                                   |               |
| Alcaligenaceae      | 0,439  | 0,127 | 1,064                             | 0,562 | 142,65                            | 0,3168        |
| Anaeroplasmataceae  | 1,299  | 0,558 | 0,669                             | 0,243 | -48,47                            | 0,2981        |
| Bacteroidaceae      | 0,922  | 0,128 | 1,178                             | 0,157 | 27,72                             | 0,2309        |
| Caulobacteraceae    | 0,001  | 0,001 | 0,000                             | 0,000 | WT ND                             | 0,3051        |
| Christensenellaceae | 0,090  | 0,021 | 0,050                             | 0,011 | -44,87                            | 0,0915        |
| Clostridiaceae      | 0,016  | 0,008 | 0,041                             | 0,022 | 159,96                            | 0,3225        |
| Comamonadaceae      | 0,000  | 0,000 | 0,005                             | 0,005 | <i>Napepld</i> <sup>ΔIEC</sup> ND | 0,3574        |
| Coriobacteriaceae   | 0,038  | 0,019 | 0,032                             | 0,011 | -15,77                            | 0,7835        |
| Deferribacteraceae  | 4,528  | 1,056 | 4,205                             | 0,791 | -7,14                             | 0,8068        |
| Dehalobacteriaceae  | 0,299  | 0,028 | 0,303                             | 0,029 | 1,52                              | 0,9115        |
| Desulfovibrionaceae | 4,926  | 0,285 | 5,333                             | 0,560 | 8,27                              | 0,5394        |
| Enterobacteriaceae  | 0,002  | 0,002 | 0,003                             | 0,003 | 11,18                             | 0,9418        |
| Erysipelotrichaceae | 2,529  | 0,774 | 2,756                             | 0,612 | 8,99                              | 0,8189        |
| Eubacteriaceae      | 0,001  | 0,001 | 0,000                             | 0,000 | WT ND                             | 0,3051        |
| F16                 | 0,048  | 0,022 | 0,005                             | 0,003 | -89,20                            | 0,0539        |
| Lachnospiraceae     | 2,522  | 0,298 | 2,465                             | 0,267 | -2,27                             | 0,8878        |
| Lactobacillaceae    | 0,088  | 0,029 | 0,101                             | 0,039 | 14,13                             | 0,8018        |
| Mogibacteriaceae    | 0,107  | 0,020 | 0,073                             | 0,016 | -31,52                            | 0,1975        |
| Odoribacteraceae    | 3,870  | 0,234 | 3,604                             | 0,297 | -6,87                             | 0,4976        |
| Peptococcaceae      | 0,196  | 0,039 | 0,201                             | 0,032 | 2,83                              | 0,9137        |
| Porphyromonadaceae  | 0,192  | 0,050 | 0,339                             | 0,073 | 76,83                             | 0,1210        |
| Prevotellaceae      | 0,007  | 0,005 | 0,039                             | 0,028 | 446,02                            | 0,2954        |
| Pseudomonadaceae    | 0,003  | 0,002 | 0,000                             | 0,000 | WT ND                             | 0,0668        |
| Rhodobacteraceae    | 0,000  | 0,000 | 0,001                             | 0,001 | <i>Napepld</i> <sup>ΔIEC</sup> ND | 0,3574        |
| Rikenellaceae       | 11,022 | 1,064 | 12,320                            | 0,896 | 11,77                             | 0,3610        |
| Ruminococcaceae     | 19,297 | 1,118 | 17,210                            | 1,020 | -10,81                            | 0,1849        |
| S24-7               | 6,620  | 1,025 | 9,463                             | 0,873 | 42,93                             | <b>0,0487</b> |
| Streptococcaceae    | 0,004  | 0,003 | 0,006                             | 0,003 | 24,48                             | 0,8020        |
| Turicibacteraceae   | 0,023  | 0,016 | 0,029                             | 0,027 | 28,89                             | 0,8420        |
| u Bacteroidale      | 7,275  | 0,676 | 8,616                             | 1,361 | 18,44                             | 0,4061        |
| u Clostridiale      | 31,657 | 1,204 | 27,154                            | 1,511 | -14,23                            | <b>0,0347</b> |
| u Lactobacillale    | 0,000  | 0,000 | 0,001                             | 0,001 | <i>Napepld</i> <sup>ΔIEC</sup> ND | 0,3574        |
| u RF32              | 0,533  | 0,101 | 1,183                             | 0,380 | 121,98                            | 0,1340        |
| u RF39              | 0,179  | 0,031 | 0,462                             | 0,220 | 158,80                            | 0,2433        |
| u YS2               | 0,107  | 0,030 | 0,101                             | 0,045 | -5,48                             | 0,9162        |
| Unassigned          | 1,158  | 0,132 | 0,986                             | 0,087 | -14,83                            | 0,2852        |

|                     | WT ND  |       | WT HFD |       | Changes (%) | p-value   |
|---------------------|--------|-------|--------|-------|-------------|-----------|
|                     | Mean   | SEM   | Mean   | SEM   |             |           |
| Alcaligenaceae      | 0,439  | 0,127 | 0,001  | 0,001 | -99,78      | 0,0020*   |
| Anaeroplasmataceae  | 1,299  | 0,558 | 0,000  | 0,000 | WT ND       | 0,0247    |
| Bacteroidaceae      | 0,922  | 0,128 | 1,920  | 0,172 | 108,09      | 0,0003*   |
| Brucellaceae        | 0,000  | 0,000 | 0,001  | 0,001 | WT HFD      | 0,3574    |
| Caulobacteraceae    | 0,001  | 0,001 | 0,000  | 0,000 | WT ND       | 0,3051    |
| Christensenellaceae | 0,090  | 0,021 | 0,021  | 0,006 | -77,10      | 0,0038*   |
| Clostridiaceae      | 0,016  | 0,008 | 0,010  | 0,004 | -39,38      | 0,5049    |
| Comamonadaceae      | 0,000  | 0,000 | 0,001  | 0,001 | WT HFD      | 0,3574    |
| Coriobacteriaceae   | 0,038  | 0,019 | 0,005  | 0,002 | -88,01      | 0,0799    |
| Deferribacteraceae  | 4,528  | 1,056 | 1,735  | 0,266 | -61,68      | 0,0154    |
| Dehalobacteriaceae  | 0,299  | 0,028 | 0,250  | 0,033 | -16,15      | 0,2832    |
| Desulfovibrionaceae | 4,926  | 0,285 | 7,910  | 0,307 | 60,57       | 0,000002* |
| Enterobacteriaceae  | 0,002  | 0,002 | 0,003  | 0,002 | 49,52       | 0,7016    |
| Erysipelotrichaceae | 2,529  | 0,774 | 0,092  | 0,046 | -96,37      | 0,0040*   |
| Eubacteriaceae      | 0,001  | 0,001 | 0,000  | 0,000 | WT ND       | 0,3051    |
| F16                 | 0,048  | 0,022 | 0,000  | 0,000 | WT ND       | 0,0309    |
| Lachnospiraceae     | 2,522  | 0,298 | 2,466  | 0,167 | -2,24       | 0,8673    |
| Lactobacillaceae    | 0,088  | 0,029 | 0,053  | 0,021 | -40,27      | 0,3247    |
| Microbacteriaceae   | 0,000  | 0,000 | 0,002  | 0,002 | WT HFD      | 0,3574    |
| Mogibacteriaceae    | 0,107  | 0,020 | 0,082  | 0,018 | -23,42      | 0,3635    |
| Odoribacteraceae    | 3,870  | 0,234 | 2,649  | 0,223 | -31,55      | 0,0015*   |
| Peptococcaceae      | 0,196  | 0,039 | 0,582  | 0,066 | 197,25      | 0,0001*   |
| Phyllobacteriaceae  | 0,000  | 0,000 | 0,001  | 0,001 | WT HFD      | 0,3574    |
| Porphyromonadaceae  | 0,192  | 0,050 | 0,287  | 0,063 | 49,72       | 0,2581    |
| Prevotellaceae      | 0,007  | 0,005 | 0,026  | 0,014 | 259,73      | 0,2403    |
| Pseudomonadaceae    | 0,003  | 0,002 | 0,001  | 0,001 | -65,91      | 0,3064    |
| Rhodobacteraceae    | 0,000  | 0,000 | 0,001  | 0,001 | WT HFD      | 0,3574    |
| Rikenellaceae       | 11,022 | 1,064 | 15,613 | 0,933 | 41,65       | 0,0046*   |
| Ruminococcaceae     | 19,297 | 1,118 | 26,504 | 0,802 | 37,34       | 0,0001*   |
| *S24-7              | 6,620  | 1,025 | 4,468  | 0,326 | -32,52      | 0,0517    |
| Streptococcaceae    | 0,004  | 0,003 | 0,007  | 0,006 | 56,31       | 0,7300    |
| Turicibacteraceae   | 0,023  | 0,016 | 0,000  | 0,000 | WT ND       | 0,1514    |
| u Bacteroidale      | 7,275  | 0,676 | 5,579  | 0,372 | -23,31      | 0,0373    |
| u Clostridiale      | 31,657 | 1,204 | 28,646 | 1,094 | -9,51       | 0,0809    |
| u RF32              | 0,533  | 0,101 | 0,130  | 0,050 | -75,64      | 0,0018*   |
| u RF39              | 0,179  | 0,031 | 0,103  | 0,029 | -42,46      | 0,0886    |
| u YS2               | 0,107  | 0,030 | 0,051  | 0,020 | -52,02      | 0,1302    |
| Unassigned          | 1,158  | 0,132 | 0,802  | 0,095 | -30,76      | 0,0401    |

|                     | WT HFD |       | <i>Napepld</i> <sup>ΔIEC</sup> HFD |       | Changes (%)                        | p-value |
|---------------------|--------|-------|------------------------------------|-------|------------------------------------|---------|
|                     | Mean   | SEM   | Mean                               | SEM   |                                    |         |
| Alcaligenaceae      | 0,001  | 0,001 | 0,000                              | 0,000 | WT HFD                             | 0,3306  |
| Anaeroplasmataceae  | 0,000  | 0,000 | 0,039                              | 0,039 | WT HFD                             | 0,3306  |
| Bacteroidaceae      | 1,920  | 0,172 | 1,857                              | 0,285 | -3,27                              | 0,8527  |
| Brucellaceae        | 0,001  | 0,001 | 0,000                              | 0,000 | WT HFD                             | 0,3306  |
| Caulobacteraceae    | 0,000  | 0,000 | 0,001                              | 0,001 | <i>Napepld</i> <sup>ΔIEC</sup> HFD | 0,3306  |
| Christensenellaceae | 0,021  | 0,006 | 0,028                              | 0,009 | 34,56                              | 0,5142  |
| Clostridiaceae      | 0,010  | 0,004 | 0,023                              | 0,020 | 143,68                             | 0,5119  |
| Comamonadaceae      | 0,001  | 0,001 | 0,000                              | 0,000 | WT HFD                             | 0,3306  |
| Coriobacteriaceae   | 0,005  | 0,002 | 0,006                              | 0,004 | 27,57                              | 0,7712  |
| Deferribacteraceae  | 1,735  | 0,266 | 2,482                              | 0,471 | 43,04                              | 0,1847  |
| Dehalobacteriaceae  | 0,250  | 0,033 | 0,240                              | 0,028 | -4,00                              | 0,8190  |
| Desulfovibrionaceae | 7,910  | 0,307 | 8,099                              | 0,499 | 2,40                               | 0,7501  |
| Enterobacteriaceae  | 0,003  | 0,002 | 0,007                              | 0,005 | 102,23                             | 0,5059  |
| Erysipelotrichaceae | 0,092  | 0,046 | 0,055                              | 0,023 | -40,09                             | 0,4825  |
| F16                 | 0,000  | 0,000 | 0,011                              | 0,006 | <i>Napepld</i> <sup>ΔIEC</sup> HFD | 0,1029  |
| Lachnospiraceae     | 2,466  | 0,167 | 2,668                              | 0,238 | 8,21                               | 0,4952  |
| Lactobacillaceae    | 0,053  | 0,021 | 0,061                              | 0,027 | 16,48                              | 0,8042  |
| Microbacteriaceae   | 0,002  | 0,002 | 0,000                              | 0,000 | WT HFD                             | 0,3306  |
| Mogibacteriaceae    | 0,082  | 0,018 | 0,045                              | 0,009 | -44,83                             | 0,0879  |
| Odoribacteraceae    | 2,649  | 0,223 | 2,211                              | 0,225 | -16,56                             | 0,1830  |
| Peptococcaceae      | 0,582  | 0,066 | 0,530                              | 0,063 | -8,87                              | 0,5792  |
| Phyllobacteriaceae  | 0,001  | 0,001 | 0,000                              | 0,000 | WT HFD                             | 0,3306  |
| Porphyromonadaceae  | 0,287  | 0,063 | 0,220                              | 0,039 | -23,25                             | 0,3795  |
| Prevotellaceae      | 0,026  | 0,014 | 0,006                              | 0,004 | -78,04                             | 0,1794  |
| Pseudomonadaceae    | 0,001  | 0,001 | 0,008                              | 0,004 | 543,88                             | 0,1249  |
| Rikenellaceae       | 15,613 | 0,933 | 14,145                             | 1,152 | -9,40                              | 0,3351  |
| Ruminococcaceae     | 26,504 | 0,802 | 24,676                             | 1,313 | -6,90                              | 0,2503  |
| S24-7               | 4,468  | 0,326 | 3,667                              | 0,327 | -17,92                             | 0,0998  |
| Streptococcaceae    | 0,007  | 0,006 | 0,000                              | 0,000 | WT HFD                             | 0,2737  |
| u Bacteroidale      | 5,579  | 0,372 | 4,538                              | 0,485 | -18,67                             | 0,1056  |
| u Clostridiale      | 28,646 | 1,094 | 33,442                             | 2,106 | 16,74                              | 0,0584  |
| u RF32              | 0,130  | 0,050 | 0,060                              | 0,032 | -53,92                             | 0,2569  |
| u RF39              | 0,103  | 0,029 | 0,044                              | 0,009 | -57,28                             | 0,0681  |
| u YS2               | 0,051  | 0,020 | 0,029                              | 0,018 | -42,87                             | 0,4284  |
| Unassigned          | 0,802  | 0,095 | 0,802                              | 0,078 | 0,02                               | 0,9990  |

All families detected by pyrosequencing are presented in the tables. Indication WT ND, *Napepld*<sup>ΔIEC</sup> ND, WT HFD or *Napepld*<sup>ΔIEC</sup> HFD in the column 'changes (%)' corresponds to the group of mice for which the given phylotype was found exclusively. P-values are based on Student *t*-test. u=unclassified. Significant P-values ( $\leq 0.05$ ) are indicated in red.

\*: significant p-values after FDR correction.

**Supplementary Table 3 : qPCR primers used in this study.**

| Gene            | Forward primer sequence (5'-3') | Reverse primer sequence (5'-3') |
|-----------------|---------------------------------|---------------------------------|
| <i>Acaca</i>    | TGTTGAGACGCTGGTTTGTAGAA         | GGTCCTTATTATTGTCCCAGACGTA       |
| <i>Acadm</i>    | GCAGAGAAGAAGGGTGACGA            | CGTGCCAACAAGAAATACCA            |
| <i>Acox1</i>    | CTATGGGATCAGCCAGAAAGG           | AGTCAAAGGCATCCACCAAAG           |
| <i>Agrp</i>     | CGGAGGTGCTAGATCCACAGA           | AGGACTCGTGCAGCCTTACAC           |
| <i>ApoA4</i>    | GCACAACAAGCTGGTGCCC             | CAGGTGCTCCTGCAACTTCTG           |
| <i>ApoB</i>     | GGAAGCTGTTGCTGAGTGGT            | ACCCTTCTCTGATGGCCTGT            |
| <i>ApoE</i>     | RRCCGTCATAGTGCCTCCA             | CAGAGCTCCCAAGTCACACA            |
| <i>Cart</i>     | TTCTGCAATTCTTCTCTTGA            | GGGAATATGGGAACCGAAGGT           |
| <i>Cd11c</i>    | ACGTCAGTACAAGGAGATGTTGGA        | ATCCTATTGCAGAATGCTTCTTTACC      |
| <i>Cd36</i>     | GCCAAGCTATTGCGACATGA            | ATCTCAATGTCCGAGACTTTTCAAC       |
| <i>Cpt1a</i>    | AGACCGTGAGGAACCTAAACCTAT        | TGAAGAGTCGCTCCCACT              |
| <i>Cnr1</i>     | CTGATGTTCTGGATCGGAGTC           | TCTGAGGTGTAATGATGATGC           |
| <i>Col6a1</i>   | AGGATGGACCACCAGGAAAC            | TCTCCCACTTACCCTCATC             |
| <i>Col6a2</i>   | CCTGGACAGAAAGGACGACA            | ACCATCCGATCCAAATTCAC            |
| <i>Dgat2</i>    | ACTCTGGAGGTTGGCACCAT            | GGGTGTGGCTCAGGAGGAT             |
| <i>Dll4</i>     | GGAACCTTCTCACTCAACATCC          | CTCGTCTGTTCCGCAAATCT            |
| <i>Elovl3</i>   | TTCTCACGCGGGTTAAAAATGG          | GAGCAACAGATAGACGACCAC           |
| <i>Col6a3</i>   | AAGAATGGCGTGAAGTTTGG            | ATTGCTGTTGGTTTGGTCGT            |
| <i>Faah</i>     | ACAGGCAGGCCTATACCTT             | GAGATGTATCGCCAGTCCGT            |
| <i>Fabp1</i>    | GCAGAGCCAGGAGAACCTTG            | TGATGTCCTTCCCTTCTGG             |
| <i>Fasn</i>     | TTCCAAGACGAAAATGATGC            | AATTGTGGGATCAGGAGAGC            |
| <i>Fatp4</i>    | GGCTCTCATCAACACCAACC            | CCAGGATCCAGAGCAGAAGA            |
| <i>F4/80</i>    | TGACAACCAGACGGCTTGTG            | GCAGGCGAGGAAAAGATAGTGT          |
| <i>Flt4</i>     | CTGGCCAGAGGCACTAAGAC            | CAGGGTGTCTCTGGGAATA             |
| <i>Gpam</i>     | TTATCACCAGGACGGAAAGG            | TCTCTTTGAAAACCCCGATG            |
| <i>Gpr119</i>   | AGCTCTGCTCAGCATAACACAG          | AAATGCCATCCGAAGGCTAC            |
| <i>Il1b</i>     | TCGCTCAGGGTCAAGAAA              | CATCAGAGGCAAGGAGGAAAAC          |
| <i>Ldlr</i>     | TGTGGGCTCCATAGGCTATCT           | GCGGTCCAGGGTCATCTTC             |
| <i>Lyve1</i>    | TGGTGTACTCCTGCCCTCT             | TTCTGCGCTGACTCTACCTG            |
| <i>Lbp</i>      | GTCCTGGGAATCTGTCCTTG            | CCGGTAACCTTGTCTTGT              |
| <i>Math1</i>    | CAAGTGTGTCCAGCAGTGTG            | TTGAGTTTCTTCAAGGCGGC            |
| <i>Mcp1</i>     | GCAGTTAACGCCCACTCA              | CCCAGCCTACTCATTGGGATCA          |
| <i>Me1</i>      | CCGGCTCTATCCTCCTTGG             | CAGTGGCCATCTTTCTTGT             |
| <i>Mgl</i>      | ATGGTCTGATTTACCTCTGGT           | TCAACCTCCGACTTGTCCGAGACA        |
| <i>Mttp</i>     | ATGATCCTCTGGCAGTGCTT            | TGAGAGGCCAGTTGTGTGAC            |
| <i>Naaa</i>     | ATTATGACCATTGGAAGCCTGCA         | CGCTCATCACTGTAGTATAAATTGTGTAG   |
| <i>Napepld</i>  | GCAAGGTCAAAGGACCAAAA            | TTCTTTGCTGGGATACTGG             |
| <i>Npc1L1</i>   | GGCTCCATCTGGAGTAGCTG            | ATCGCACTACCATCCAGGAC            |
| <i>Npy</i>      | CAGAAAACGCCCCAGAAC              | CGGGAGAACAAGTTTCATTTC           |
| <i>Oxytocin</i> | CCTGGATATGCGCAAGTGT             | GGCGAAGGCAGGTAGTTCTC            |
| <i>Pai1</i>     | ACAGCCTTTGTCATCTCAGCC           | CCGAACCACAAAGAGAAAGGA           |
| <i>Pgc1a</i>    | AGCCGTGACCACTGACAACGAG          | GCTGCATGGTTCTGAGTGCTAAG         |
| <i>Ppara</i>    | CAACGGCGTCAAGACAAA              | TGACGGTCTCCAGGACAT              |
| <i>Pomc</i>     | AGGCCTGACACGTGGAAGAT            | AGCAGGAGGGCCAGCAA               |
| <i>Rpl19</i>    | GAAGGTCAAAGGGAATGTGTTCA         | CCTTGTCTGCCTTCAAGTCTGT          |
| <i>Scd1</i>     | CCTCTTCGGGATTTTCTACTACATG       | GCCGTGCCTTGTAAAGTCTGT           |
| <i>Srebf1</i>   | GATCAAAGAGGAGCCAGTGT            | TAGATGGTGGCTGCTGAGTG            |
| <i>Tnfa</i>     | AGCCCCAGTCTGTATCCTT             | GGTCACTGTCCAGCATCTT             |
| <i>Ucp1</i>     | GCTACACGGGGACCTACAATC           | CGTCATCTGCCAGTATTTTGT           |

**Supplementary Table 4: antibodies used in this study. antibodies used in this study.**

| <b>Target</b>                        | <b>Dilution</b>            | <b>Reference</b>                    |
|--------------------------------------|----------------------------|-------------------------------------|
| Rabbit anti NAPE-PLD                 | 1:200                      | Ab95397 (Abcam) <sup>1</sup>        |
| Mouse anti $\beta$ -actin            | 1:10000                    | Ab6276 (Abcam) <sup>1</sup>         |
| Rabbit anti-Akt                      | 1:1000                     | 9272S (Cell Signaling) <sup>1</sup> |
| Rabbit anti p-Akt <sup>Ser473</sup>  | 1:1000                     | 4060S (Cell Signaling) <sup>1</sup> |
| Rabbit anti p-Akt <sup>Thr308</sup>  | 1:1000                     | 2965S (Cell Signaling)              |
| Rabbit anti AMPK                     | 1:1000                     | 2603S (cell Signaling) <sup>2</sup> |
| Rabbit anti p-AMPK <sup>Thr172</sup> | 1:1000                     | 2535S (Cell Signaling) <sup>2</sup> |
| Mouse anti $\alpha$ -tubulin         | 1:2000                     | T6199 (sigma)                       |
| Rabbit anti c-Fos                    | 1:2000 (IHC); 1:10000 (IF) | Ab190289 (Abcam) <sup>3</sup>       |
| Rabbit anti-POMC                     | 1:1000                     | Ab94446 (Abcam)                     |
| Rabbit anti-mouse                    | 1:4000                     | P0260 (Dako)                        |
| Goat anti-rabbit, HRP-conjugated     | 1:10000 (WB)               | AP132P (Chemicon)                   |
| Goat anti-rabbit, HRP-conjugated     | Ready to use (histology)   | K4010 (Envision kit, Dako)          |

**Supplementary Table 5: Lysophosphatidylcholines (LPC) and phosphatidylcholines (PC), quantification in the small intestine from different groups (pmol/mg of tissue)**

|             | WT ND  |       | Napepld <sup>ΔIEC</sup> ND |       | WT HFD  |       | Napepld <sup>ΔIEC</sup> HFD |       |
|-------------|--------|-------|----------------------------|-------|---------|-------|-----------------------------|-------|
|             | Mean   | SEM   | Mean                       | SEM   | Mean    | SEM   | Mean                        | SEM   |
| LPC a C16:0 | 186,04 | 16,82 | 211,55                     | 26,67 | 126,44* | 7,90  | 129,79                      | 11,88 |
| LPC a C18:0 | 118,57 | 7,41  | 123,23                     | 9,94  | 123,47  | 7,30  | 121,80                      | 7,37  |
| LPC a C18:1 | 33,19  | 3,24  | 38,74                      | 4,71  | 21,17*  | 2,13  | 19,64                       | 1,19  |
| LPC a C18:2 | 20,48  | 1,81  | 26,09                      | 3,07  | 19,13   | 1,67  | 17,67                       | 0,76  |
| LPC a C20:4 | 7,17   | 0,73  | 9,39                       | 1,46  | 6,50    | 0,73  | 7,37                        | 0,47  |
| LPC e C18:0 | 4,57   | 0,46  | 5,07                       | 0,44  | 4,71    | 0,24  | 4,75                        | 0,28  |
| PC aa C30:0 | 2,46   | 0,31  | 2,19                       | 0,16  | 1,49*   | 0,13  | 1,51                        | 0,22  |
| PC aa C32:0 | 12,34  | 1,59  | 11,68                      | 1,37  | 8,25    | 0,82  | 8,96                        | 0,83  |
| PC aa C32:1 | 29,89  | 2,26  | 26,39                      | 1,75  | 8,50*   | 0,43  | 9,11                        | 0,97  |
| PC aa C32:2 | 3,22   | 0,25  | 3,04                       | 0,23  | 1,12*   | 0,08  | 1,07                        | 0,15  |
| PC aa C34:0 | 3,31   | 0,49  | 3,83                       | 0,59  | 3,17    | 0,27  | 3,25                        | 0,42  |
| PC aa C34:1 | 95,06  | 10,27 | 86,85                      | 7,01  | 55,79*  | 3,82  | 55,99                       | 5,89  |
| PC aa C34:2 | 694,65 | 85,01 | 725,84                     | 80,47 | 626,68  | 32,62 | 597,04                      | 69,16 |
| PC aa C34:3 | 41,96  | 2,89  | 42,02                      | 4,94  | 19,46*  | 1,20  | 18,24                       | 2,26  |
| PC aa C36:0 | 4,00   | 0,45  | 3,89                       | 0,44  | 3,90    | 0,25  | 3,71                        | 0,35  |
| PC aa C36:1 | 6,60   | 1,18  | 4,67                       | 0,66  | 1,36*   | 0,55  | 1,63                        | 0,80  |
| PC aa C36:2 | 171,68 | 27,97 | 163,99                     | 19,00 | 216,93  | 15,73 | 198,70                      | 17,19 |
| PC aa C36:3 | 150,37 | 19,47 | 138,63                     | 12,43 | 106,28  | 8,16  | 98,08                       | 10,30 |
| PC aa C36:4 | 343,99 | 30,77 | 352,53                     | 35,10 | 237,68* | 12,96 | 279,21                      | 26,01 |
| PC aa C36:5 | 29,32  | 2,41  | 29,12                      | 3,58  | 12,04*  | 0,65  | 13,29                       | 1,02  |
| PC aa C38:1 | 0,35   | 0,06  | 0,28                       | 0,03  | 0,19*   | 0,02  | 0,23                        | 0,04  |
| PC aa C38:2 | 0,81   | 0,13  | 0,63                       | 0,08  | 0,54    | 0,10  | 0,54                        | 0,09  |
| PC aa C38:3 | 8,44   | 1,42  | 6,30                       | 0,93  | 3,52*   | 0,38  | 4,13                        | 0,54  |
| PC aa C38:4 | 108,56 | 12,55 | 102,88                     | 9,34  | 97,17   | 8,33  | 111,39                      | 9,97  |
| PC aa C38:5 | 65,91  | 6,48  | 62,67                      | 4,98  | 41,33*  | 2,51  | 45,17                       | 4,45  |
| PC aa C38:6 | 70,29  | 6,51  | 72,32                      | 8,18  | 50,30*  | 2,26  | 55,09                       | 4,71  |
| PC aa C40:4 | 1,26   | 0,12  | 1,11                       | 0,17  | 0,93*   | 0,09  | 0,91                        | 0,13  |
| PC aa C40:5 | 2,20   | 0,24  | 2,04                       | 0,22  | 1,16*   | 0,16  | 1,44                        | 0,23  |
| PC aa C40:6 | 13,33  | 1,72  | 12,39                      | 1,38  | 11,95   | 0,94  | 12,52                       | 0,95  |
| PC aa C40:7 | 7,33   | 0,75  | 6,76                       | 0,60  | 4,47*   | 0,26  | 4,77                        | 0,39  |
| PC aa C40:8 | 6,83   | 0,62  | 6,81                       | 0,65  | 6,50    | 0,40  | 6,72                        | 0,50  |
| PC ae C32:0 | 1,84   | 0,23  | 1,63                       | 0,16  | 1,04*   | 0,09  | 1,06                        | 0,10  |
| PC ae C32:1 | 1,22   | 0,11  | 1,08                       | 0,05  | 0,48*   | 0,04  | 0,46                        | 0,07  |
| PC ae C32:6 | 0,02   | 0,01  | 0,02                       | 0,01  | 0,00    | 0,00  | 0,01                        | 0,01  |
| PC ae C34:0 | 0,35   | 0,06  | 0,40                       | 0,03  | 0,40    | 0,05  | 0,33                        | 0,04  |
| PC ae C34:1 | 6,06   | 0,66  | 5,32                       | 0,40  | 3,53*   | 0,26  | 3,88                        | 0,49  |
| PC ae C34:2 | 5,01   | 0,45  | 4,39                       | 0,48  | 3,54*   | 0,29  | 3,25                        | 0,48  |
| PC ae C34:3 | 0,62   | 0,05  | 0,56                       | 0,06  | 0,39*   | 0,04  | 0,32                        | 0,04  |
| PC ae C36:1 | 2,44   | 0,22  | 2,40                       | 0,24  | 1,84*   | 0,16  | 2,06                        | 0,20  |
| PC ae C36:2 | 8,52   | 1,05  | 8,98                       | 1,09  | 10,43   | 0,88  | 9,60                        | 0,81  |
| PC ae C36:3 | 2,63   | 0,28  | 2,71                       | 0,26  | 2,28    | 0,16  | 2,11                        | 0,23  |
| PC ae C36:4 | 5,84   | 0,59  | 5,67                       | 0,38  | 4,02*   | 0,27  | 4,45                        | 0,58  |
| PC ae C36:5 | 3,56   | 0,36  | 3,45                       | 0,39  | 2,32*   | 0,19  | 2,43                        | 0,24  |

|                    |      |      |      |      |       |      |      |      |
|--------------------|------|------|------|------|-------|------|------|------|
| <b>PC ae C38:1</b> | 0,69 | 0,09 | 0,63 | 0,06 | 0,52  | 0,03 | 0,57 | 0,09 |
| <b>PC ae C38:2</b> | 2,57 | 0,53 | 2,74 | 0,62 | 1,91  | 0,27 | 1,85 | 0,22 |
| <b>PC ae C38:3</b> | 1,55 | 0,16 | 1,41 | 0,11 | 0,95* | 0,08 | 1,07 | 0,10 |
| <b>PC ae C38:4</b> | 5,47 | 0,53 | 5,79 | 0,56 | 5,17  | 0,44 | 5,94 | 0,57 |
| <b>PC ae C38:5</b> | 6,91 | 0,63 | 7,02 | 0,42 | 5,53  | 0,25 | 6,48 | 0,79 |
| <b>PC ae C38:6</b> | 2,90 | 0,28 | 2,84 | 0,21 | 1,70* | 0,09 | 1,76 | 0,22 |
| <b>PC ae C40:5</b> | 1,01 | 0,09 | 0,94 | 0,08 | 0,81  | 0,06 | 0,82 | 0,06 |

---

\*Significantly different from WT ND, P-values <0,05, Student *t*-test.



**Supplementary Table 6: Lysophosphatidylethanolamines (LPE) and phosphatidylethanolamines (PE), quantification in the small intestine from different groups (pmol/mg of tissue)**

|             | WT ND |      | Napepld <sup>ΔIEC</sup> ND |      | WT HFD |      | Napepld <sup>ΔIEC</sup> HFD |      |
|-------------|-------|------|----------------------------|------|--------|------|-----------------------------|------|
|             | Mean  | SEM  | Mean                       | SEM  | Mean   | SEM  | Mean                        | SEM  |
| LPE a C16:0 | 1,49  | 0,10 | 1,84                       | 0,18 | 0,95*  | 0,14 | 1,10                        | 0,16 |
| LPE a C18:0 | 2,64  | 0,30 | 3,20                       | 0,33 | 2,88   | 0,56 | 2,99                        | 0,43 |
| LPE a C18:1 | 0,94  | 0,07 | 1,13                       | 0,11 | 1,09   | 0,27 | 0,98                        | 0,11 |
| LPE a C18:2 | 0,42  | 0,05 | 0,54                       | 0,03 | 0,42   | 0,07 | 0,42                        | 0,03 |
| LPE a C20:4 | 0,32  | 0,03 | 0,44*                      | 0,04 | 0,25   | 0,04 | 0,31                        | 0,01 |
| LPE a C22:4 | 0,06  | 0,00 | 0,07                       | 0,00 | 0,06   | 0,01 | 0,06                        | 0,00 |
| LPE a C22:5 | 0,04  | 0,00 | 0,05*                      | 0,00 | 0,04   | 0,00 | 0,04                        | 0,00 |
| LPE a C22:6 | 0,23  | 0,02 | 0,32*                      | 0,03 | 0,15*  | 0,02 | 0,21 <sup>§</sup>           | 0,02 |
| LPE e C18:0 | 0,10  | 0,01 | 0,12                       | 0,01 | 0,09   | 0,01 | 0,10                        | 0,01 |
| LPG e C14:2 | 0,43  | 0,08 | 0,44                       | 0,04 | 0,45   | 0,09 | 0,44                        | 0,05 |
| PE aa C20:0 | 0,03  | 0,00 | 0,04                       | 0,01 | 0,02*  | 0,00 | 0,02                        | 0,00 |
| PE aa C22:2 | 0,01  | 0,00 | 0,01                       | 0,00 | 0,01*  | 0,00 | 0,01                        | 0,00 |
| PE aa C26:4 | 0,21  | 0,03 | 0,22                       | 0,03 | 0,13*  | 0,02 | 0,14                        | 0,01 |
| PE aa C28:4 | 0,05  | 0,01 | 0,05                       | 0,01 | 0,06   | 0,01 | 0,06                        | 0,00 |
| PE aa C28:5 | 0,02  | 0,00 | 0,02                       | 0,00 | 0,01   | 0,00 | 0,01                        | 0,00 |
| PE aa C34:0 | 0,06  | 0,01 | 0,06                       | 0,01 | 0,03*  | 0,00 | 0,04                        | 0,01 |
| PE aa C34:1 | 0,76  | 0,08 | 0,77                       | 0,07 | 0,33*  | 0,04 | 0,39                        | 0,05 |
| PE aa C34:2 | 6,34  | 1,09 | 6,76                       | 0,78 | 3,90   | 0,36 | 4,34                        | 0,58 |
| PE aa C34:3 | 0,71  | 0,10 | 0,65                       | 0,11 | 0,20*  | 0,02 | 0,22                        | 0,03 |
| PE aa C36:0 | 0,38  | 0,05 | 0,40                       | 0,04 | 0,19*  | 0,02 | 0,23                        | 0,03 |
| PE aa C36:1 | 1,62  | 0,20 | 1,60                       | 0,21 | 1,04*  | 0,13 | 1,19                        | 0,16 |
| PE aa C36:2 | 20,17 | 3,33 | 21,06                      | 2,76 | 19,74  | 2,13 | 20,24                       | 2,37 |
| PE aa C36:3 | 8,83  | 1,55 | 8,27                       | 1,08 | 7,44   | 0,91 | 7,36                        | 0,98 |
| PE aa C36:4 | 12,33 | 1,63 | 13,71                      | 1,17 | 7,00*  | 0,71 | 8,71                        | 0,88 |
| PE aa C36:5 | 1,68  | 0,19 | 1,63                       | 0,16 | 0,51*  | 0,05 | 0,62                        | 0,07 |
| PE aa C38:0 | 0,62  | 0,07 | 0,64                       | 0,06 | 0,34*  | 0,03 | 0,41                        | 0,04 |
| PE aa C38:1 | 0,23  | 0,03 | 0,23                       | 0,02 | 0,12*  | 0,01 | 0,14                        | 0,02 |
| PE aa C38:2 | 0,26  | 0,04 | 0,28                       | 0,04 | 0,16   | 0,02 | 0,19                        | 0,02 |
| PE aa C38:3 | 2,32  | 0,30 | 2,36                       | 0,28 | 1,07*  | 0,11 | 1,32                        | 0,15 |
| PE aa C38:4 | 27,96 | 4,15 | 31,30                      | 3,30 | 22,66  | 2,55 | 28,23                       | 2,36 |
| PE aa C38:5 | 6,87  | 0,82 | 7,04                       | 0,55 | 4,96   | 0,54 | 5,89                        | 0,53 |
| PE aa C38:6 | 11,04 | 1,31 | 13,06                      | 1,40 | 6,07*  | 0,56 | 8,20                        | 0,90 |
| PE aa C38:7 | 0,72  | 0,06 | 0,73                       | 0,06 | 0,27*  | 0,02 | 0,35                        | 0,03 |
| PE aa C40:2 | 0,05  | 0,01 | 0,05                       | 0,01 | 0,03*  | 0,00 | 0,03                        | 0,00 |
| PE aa C40:3 | 0,04  | 0,00 | 0,04                       | 0,01 | 0,02*  | 0,00 | 0,02                        | 0,00 |
| PE aa C40:4 | 0,64  | 0,08 | 0,74                       | 0,10 | 0,43*  | 0,05 | 0,51                        | 0,05 |
| PE aa C40:5 | 0,98  | 0,12 | 1,11                       | 0,12 | 0,62*  | 0,07 | 0,74                        | 0,08 |
| PE aa C40:6 | 6,51  | 0,88 | 7,38                       | 0,90 | 3,83*  | 0,41 | 4,82                        | 0,47 |
| PE aa C40:7 | 4,09  | 0,37 | 4,39                       | 0,42 | 2,45*  | 0,24 | 2,99                        | 0,26 |
| PE aa C48:1 | 0,01  | 0,00 | 0,01                       | 0,00 | 0,01   | 0,00 | 0,01                        | 0,00 |
| PE ae C34:1 | 0,11  | 0,01 | 0,11                       | 0,01 | 0,05*  | 0,00 | 0,06                        | 0,01 |
| PE ae C34:2 | 0,13  | 0,01 | 0,13                       | 0,02 | 0,07*  | 0,01 | 0,08                        | 0,01 |
| PE ae C34:3 | 0,04  | 0,01 | 0,04                       | 0,01 | 0,02*  | 0,00 | 0,02                        | 0,00 |

|                    |      |      |      |      |       |      |      |      |
|--------------------|------|------|------|------|-------|------|------|------|
| <b>PE ae C36:1</b> | 0,25 | 0,03 | 0,25 | 0,03 | 0,15* | 0,02 | 0,18 | 0,03 |
| <b>PE ae C36:2</b> | 1,07 | 0,12 | 1,17 | 0,14 | 0,82  | 0,08 | 0,85 | 0,09 |
| <b>PE ae C36:3</b> | 0,28 | 0,03 | 0,28 | 0,03 | 0,17* | 0,01 | 0,19 | 0,02 |
| <b>PE ae C36:4</b> | 0,49 | 0,04 | 0,54 | 0,05 | 0,27* | 0,02 | 0,32 | 0,04 |
| <b>PE ae C36:5</b> | 0,34 | 0,04 | 0,35 | 0,04 | 0,17* | 0,02 | 0,21 | 0,03 |
| <b>PE ae C38:1</b> | 0,17 | 0,02 | 0,16 | 0,03 | 0,07* | 0,01 | 0,10 | 0,01 |
| <b>PE ae C38:2</b> | 0,34 | 0,05 | 0,40 | 0,07 | 0,20* | 0,02 | 0,23 | 0,03 |
| <b>PE ae C38:3</b> | 0,21 | 0,02 | 0,22 | 0,02 | 0,10* | 0,01 | 0,10 | 0,01 |
| <b>PE ae C38:4</b> | 2,74 | 0,30 | 3,25 | 0,36 | 2,43  | 0,27 | 2,86 | 0,25 |
| <b>PE ae C38:5</b> | 0,91 | 0,08 | 0,98 | 0,09 | 0,60* | 0,06 | 0,69 | 0,08 |
| <b>PE ae C38:6</b> | 1,61 | 0,17 | 1,75 | 0,18 | 0,84* | 0,08 | 0,89 | 0,12 |
| <b>PE ae C40:1</b> | 1,09 | 0,11 | 1,22 | 0,11 | 0,65* | 0,06 | 0,80 | 0,07 |
| <b>PE ae C40:2</b> | 0,26 | 0,03 | 0,30 | 0,04 | 0,15* | 0,01 | 0,18 | 0,02 |
| <b>PE ae C40:3</b> | 0,08 | 0,01 | 0,09 | 0,01 | 0,03* | 0,00 | 0,04 | 0,00 |
| <b>PE ae C40:4</b> | 1,09 | 0,15 | 1,28 | 0,19 | 0,85  | 0,09 | 1,01 | 0,10 |
| <b>PE ae C40:5</b> | 0,73 | 0,07 | 0,80 | 0,09 | 0,51* | 0,05 | 0,56 | 0,06 |
| <b>PE ae C40:6</b> | 2,59 | 0,31 | 3,10 | 0,41 | 1,58* | 0,16 | 1,85 | 0,20 |
| <b>PE ae C42:1</b> | 0,13 | 0,01 | 0,13 | 0,01 | 0,10  | 0,01 | 0,12 | 0,01 |
| <b>PE ae C42:2</b> | 0,17 | 0,02 | 0,18 | 0,02 | 0,10* | 0,01 | 0,12 | 0,01 |
| <b>PE ae C46:5</b> | 0,01 | 0,00 | 0,01 | 0,00 | 0,00* | 0,00 | 0,00 | 0,00 |
| <b>PE ae C46:6</b> | 0,11 | 0,01 | 0,10 | 0,01 | 0,09  | 0,01 | 0,09 | 0,01 |

---

\*Significantly different from WT ND, P-values <0,05, Student t-test. †Significantly different from WT HFD, P-values <0,05, Student t-test.

**Supplementary Table 7: Phosphatidylglycerols (PG), quantification in the small intestine from different groups (pmol/mg of tissue)**

|                    | WT ND |      | Napepld <sup>ΔIEC</sup> ND |      | WT HFD |      | Napepld <sup>ΔIEC</sup> HFD |      |
|--------------------|-------|------|----------------------------|------|--------|------|-----------------------------|------|
|                    | Mean  | SEM  | Mean                       | SEM  | Mean   | SEM  | Mean                        | SEM  |
| <b>PG aa C30:0</b> | 0,09  | 0,01 | 0,11                       | 0,02 | 0,04*  | 0,00 | 0,09 <sup>§</sup>           | 0,01 |
| <b>PG aa C32:0</b> | 0,20  | 0,04 | 0,19                       | 0,02 | 0,10   | 0,02 | 0,18 <sup>§</sup>           | 0,03 |
| <b>PG aa C32:1</b> | 0,38  | 0,07 | 0,30                       | 0,04 | 0,14*  | 0,03 | 0,18                        | 0,02 |
| <b>PG aa C33:6</b> | 0,04  | 0,01 | 0,04                       | 0,01 | 0,02   | 0,01 | 0,03                        | 0,01 |
| <b>PG aa C34:0</b> | 0,13  | 0,03 | 0,13                       | 0,03 | 0,08   | 0,03 | 0,09                        | 0,03 |
| <b>PG aa C34:1</b> | 9,85  | 0,86 | 10,05                      | 0,87 | 5,54*  | 0,66 | 6,63                        | 0,33 |
| <b>PG aa C34:2</b> | 4,06  | 0,68 | 3,79                       | 0,37 | 3,27   | 0,45 | 5,45                        | 0,40 |
| <b>PG aa C34:3</b> | 0,45  | 0,07 | 0,41                       | 0,04 | 0,20*  | 0,03 | 0,35 <sup>§</sup>           | 0,04 |
| <b>PG aa C36:0</b> | 0,09  | 0,01 | 0,12                       | 0,03 | 0,08   | 0,01 | 0,09                        | 0,02 |
| <b>PG aa C36:1</b> | 0,72  | 0,13 | 0,65                       | 0,07 | 0,43   | 0,06 | 0,63                        | 0,06 |
| <b>PG aa C36:2</b> | 2,06  | 0,45 | 1,70                       | 0,26 | 2,22   | 0,33 | 3,36                        | 0,18 |
| <b>PG aa C36:3</b> | 0,96  | 0,17 | 0,83                       | 0,11 | 0,85   | 0,14 | 1,19                        | 0,12 |
| <b>PG aa C36:4</b> | 1,18  | 0,13 | 1,23                       | 0,14 | 0,73   | 0,10 | 1,15 <sup>§</sup>           | 0,09 |
| <b>PG aa C38:5</b> | 0,33  | 0,05 | 0,23                       | 0,02 | 0,19   | 0,03 | 0,29                        | 0,04 |
| <b>PG ae C32:0</b> | 0,05  | 0,01 | 0,04                       | 0,01 | 0,03   | 0,01 | 0,05                        | 0,02 |
| <b>PG ae C34:0</b> | 0,03  | 0,01 | 0,04                       | 0,01 | 0,02   | 0,00 | 0,03                        | 0,00 |
| <b>PG ae C34:1</b> | 0,12  | 0,02 | 0,10                       | 0,02 | 0,06   | 0,01 | 0,07                        | 0,01 |
| <b>PG ae C36:1</b> | 0,24  | 0,02 | 0,27                       | 0,04 | 0,19   | 0,02 | 0,25                        | 0,03 |

\*Significantly different from WT ND, P-values <0,05, Student t-test. <sup>§</sup>Significantly different from WT HFD, P-values <0,05, Student t-test.

**Supplementary Table 8: Phosphatidylserines (PS), quantification in the small intestine from different groups (µmol/mg of tissue)**

|             | WT ND |      | Napepld <sup>ΔIEC</sup> ND |      | WT HFD |      | Napepld <sup>ΔIEC</sup> HFD |      |
|-------------|-------|------|----------------------------|------|--------|------|-----------------------------|------|
|             | Mean  | SEM  | Mean                       | SEM  | Mean   | SEM  | Mean                        | SEM  |
| PS aa C34:1 | 0,15  | 0,02 | 0,15                       | 0,01 | 0,06*  | 0,01 | 0,08                        | 0,02 |
| PS aa C34:2 | 0,25  | 0,03 | 0,26                       | 0,05 | 0,20   | 0,02 | 0,21                        | 0,03 |
| PS aa C36:0 | 0,07  | 0,01 | 0,11                       | 0,01 | 0,07   | 0,01 | 0,07                        | 0,01 |
| PS aa C36:1 | 1,00  | 0,11 | 1,02                       | 0,18 | 0,64*  | 0,08 | 0,73                        | 0,08 |
| PS aa C36:2 | 3,96  | 0,42 | 4,13                       | 0,43 | 3,14   | 0,41 | 3,03                        | 0,26 |
| PS aa C36:3 | 0,40  | 0,09 | 0,33                       | 0,04 | 0,22   | 0,03 | 0,24                        | 0,02 |
| PS aa C36:4 | 0,19  | 0,02 | 0,21                       | 0,03 | 0,15   | 0,02 | 0,21                        | 0,03 |
| PS aa C38:1 | 0,02  | 0,00 | 0,03                       | 0,01 | 0,01   | 0,00 | 0,02                        | 0,00 |
| PS aa C38:2 | 0,11  | 0,01 | 0,12                       | 0,02 | 0,08   | 0,01 | 0,10                        | 0,01 |
| PS aa C38:3 | 0,95  | 0,10 | 0,88                       | 0,15 | 0,47*  | 0,05 | 0,58                        | 0,04 |
| PS aa C38:4 | 2,80  | 0,37 | 3,04                       | 0,44 | 2,79   | 0,40 | 3,26                        | 0,22 |
| PS aa C38:5 | 0,36  | 0,04 | 0,34                       | 0,04 | 0,26   | 0,03 | 0,28                        | 0,03 |
| PS aa C40:1 | 0,01  | 0,00 | 0,01                       | 0,00 | 0,00   | 0,00 | 0,01                        | 0,00 |
| PS aa C40:2 | 0,02  | 0,00 | 0,02                       | 0,01 | 0,02   | 0,00 | 0,01                        | 0,00 |
| PS aa C40:3 | 0,02  | 0,01 | 0,03                       | 0,01 | 0,01   | 0,00 | 0,02                        | 0,00 |
| PS aa C40:4 | 0,51  | 0,04 | 0,55                       | 0,08 | 0,41   | 0,05 | 0,41                        | 0,04 |
| PS aa C40:5 | 0,28  | 0,02 | 0,31                       | 0,04 | 0,21   | 0,04 | 0,24                        | 0,03 |
| PS aa C40:6 | 1,58  | 0,19 | 1,67                       | 0,25 | 0,98*  | 0,14 | 1,06                        | 0,10 |
| PS aa C40:7 | 0,18  | 0,02 | 0,17                       | 0,02 | 0,12   | 0,01 | 0,13                        | 0,02 |
| PS aa C42:1 | 0,01  | 0,00 | 0,00                       | 0,00 | 0,00   | 0,00 | 0,00 <sup>s</sup>           | 0,00 |
| PS aa C42:2 | 0,01  | 0,00 | 0,01                       | 0,00 | 0,00   | 0,00 | 0,01                        | 0,00 |
| PS aa C42:4 | 0,01  | 0,00 | 0,01                       | 0,01 | 0,01   | 0,00 | 0,01                        | 0,00 |
| PS aa C42:5 | 0,02  | 0,00 | 0,02                       | 0,01 | 0,02   | 0,00 | 0,01                        | 0,00 |
| PS ae C34:2 | 0,01  | 0,00 | 0,01                       | 0,00 | 0,00   | 0,00 | 0,00                        | 0,00 |
| PS ae C36:1 | 0,04  | 0,01 | 0,04                       | 0,01 | 0,03   | 0,00 | 0,03                        | 0,00 |
| PS ae C36:2 | 0,08  | 0,01 | 0,07                       | 0,01 | 0,06   | 0,01 | 0,06                        | 0,01 |
| PS ae C38:4 | 0,06  | 0,01 | 0,06                       | 0,01 | 0,06   | 0,01 | 0,07                        | 0,01 |

\*Significantly different from WT ND, P-values <0,05, Student *t*-test. <sup>s</sup>Significantly different from WT HFD, P-values <0,05, Student *t*-test.

**Supplementary Table 9: sphingomyelins (SM), quantification in the small intestine from different groups (pmol/mg of tissue)**

|          | WT ND  |       | Napepld <sup>ΔIEC</sup> ND |       | WT HFD |      | Napepld <sup>ΔIEC</sup> HFD |      |
|----------|--------|-------|----------------------------|-------|--------|------|-----------------------------|------|
|          | Mean   | SEM   | Mean                       | SEM   | Mean   | SEM  | Mean                        | SEM  |
| SM C3:0  | 0,90   | 0,06  | 1,28*                      | 0,12  | 0,91   | 0,11 | 0,76                        | 0,05 |
| SM C14:0 | 3,05   | 0,53  | 4,26                       | 0,74  | 3,98   | 0,27 | 3,35                        | 0,20 |
| SM C15:0 | 10,99  | 2,24  | 13,25                      | 2,50  | 12,57  | 1,00 | 10,76                       | 0,63 |
| SM C16:0 | 113,03 | 15,79 | 105,72                     | 10,72 | 95,38  | 6,62 | 97,05                       | 6,57 |
| SM C16:1 | 5,01   | 0,65  | 4,89                       | 0,44  | 4,22   | 0,13 | 4,53                        | 0,29 |
| SM C17:0 | 1,38   | 0,19  | 1,40                       | 0,19  | 1,43   | 0,11 | 1,31                        | 0,08 |
| SM C18:0 | 3,94   | 0,62  | 3,63                       | 0,53  | 4,24   | 0,38 | 4,35                        | 0,33 |
| SM C18:1 | 1,85   | 0,19  | 1,76                       | 0,20  | 2,09   | 0,15 | 1,90                        | 0,13 |
| SM C19:0 | 0,14   | 0,04  | 0,26                       | 0,03  | 0,17   | 0,06 | 0,13                        | 0,04 |
| SM C19:1 | 0,14   | 0,03  | 0,11                       | 0,01  | 0,09   | 0,02 | 0,09                        | 0,02 |
| SM C19:2 | 0,18   | 0,01  | 0,16                       | 0,02  | 0,13*  | 0,02 | 0,14                        | 0,02 |
| SM C20:1 | 0,29   | 0,21  | 0,35                       | 0,10  | 0,44   | 0,09 | 0,31                        | 0,10 |
| SM C20:2 | 1,54   | 0,11  | 1,54                       | 0,12  | 0,76*  | 0,04 | 0,75                        | 0,08 |
| SM C21:0 | 0,68   | 0,11  | 0,78                       | 0,14  | 0,90   | 0,17 | 0,72                        | 0,07 |
| SM C21:1 | 0,33   | 0,07  | 0,36                       | 0,08  | 0,36   | 0,02 | 0,33                        | 0,06 |
| SM C21:2 | 0,61   | 0,07  | 0,63                       | 0,04  | 0,43*  | 0,05 | 0,51                        | 0,07 |
| SM C21:3 | 0,29   | 0,05  | 0,32                       | 0,04  | 0,21   | 0,03 | 0,17                        | 0,05 |
| SM C22:0 | 11,82  | 1,78  | 12,93                      | 1,78  | 12,61  | 1,02 | 12,51                       | 1,21 |
| SM C22:1 | 19,33  | 2,98  | 17,97                      | 1,74  | 13,48  | 0,81 | 13,03                       | 1,33 |
| SM C22:2 | 26,64  | 2,88  | 26,34                      | 3,18  | 20,90  | 1,60 | 23,76                       | 2,11 |
| SM C22:3 | 2,23   | 0,19  | 2,09                       | 0,31  | 0,93*  | 0,05 | 1,00                        | 0,15 |
| SM C23:0 | 0,56   | 0,11  | 0,57                       | 0,12  | 0,40   | 0,07 | 0,39                        | 0,05 |
| SM C23:1 | 0,57   | 0,10  | 0,54                       | 0,06  | 0,41   | 0,04 | 0,47                        | 0,03 |
| SM C23:2 | 0,37   | 0,07  | 0,40                       | 0,11  | 0,34   | 0,08 | 0,39                        | 0,06 |
| SM C23:3 | 0,01   | 0,01  | 0,05                       | 0,03  | 0,12*  | 0,04 | 0,01                        | 0,01 |
| SM C24:0 | 0,57   | 0,11  | 0,53                       | 0,09  | 0,35   | 0,05 | 0,31                        | 0,05 |
| SM C24:1 | 3,86   | 0,59  | 4,26                       | 0,59  | 3,41   | 0,39 | 3,59                        | 0,33 |
| SM C24:2 | 9,11   | 1,18  | 8,97                       | 0,86  | 8,25   | 0,71 | 9,85                        | 1,23 |
| SM C24:3 | 5,39   | 0,46  | 6,22                       | 0,50  | 3,54*  | 0,34 | 4,30                        | 0,41 |
| SM C24:4 | 3,88   | 0,47  | 4,29                       | 0,61  | 3,15   | 0,23 | 3,59                        | 0,37 |
| SM C26:3 | 1,06   | 0,14  | 0,97                       | 0,10  | 0,73   | 0,06 | 0,77                        | 0,06 |
| SM C26:4 | 0,64   | 0,13  | 0,67                       | 0,08  | 0,68   | 0,09 | 0,49                        | 0,09 |

\*Significantly different from WT ND, P-values <0,05, Student t-test.

**Supplementary Table 10: Ceramides (Cer), quantification in the small intestine from different groups (pmol/mg of tissue)**

|                     | WT ND |      | Napepld <sup>ΔIEC</sup> ND |      | WT HFD |      | Napepld <sup>ΔIEC</sup> HFD |      |
|---------------------|-------|------|----------------------------|------|--------|------|-----------------------------|------|
|                     | Mean  | SEM  | Mean                       | SEM  | Mean   | SEM  | Mean                        | SEM  |
| N-C10:0(OH)-Cer     | 0,01  | 0,00 | 0,01*                      | 0,00 | 0,01*  | 0,00 | 0,01                        | 0,00 |
| N-C10:0-Cer         | 0,32  | 0,04 | 0,41                       | 0,04 | 0,24   | 0,04 | 0,27                        | 0,04 |
| N-C11:0(OH)-Cer     | 0,01  | 0,00 | 0,02                       | 0,00 | 0,01*  | 0,00 | 0,01                        | 0,00 |
| N-C12:0(OH)-Cer     | 0,01  | 0,00 | 0,01                       | 0,00 | 0,01   | 0,00 | 0,01                        | 0,00 |
| N-C12:0-Cer         | 1,63  | 0,16 | 2,14                       | 0,25 | 1,20*  | 0,11 | 1,34                        | 0,12 |
| N-C13:0-Cer(2H)     | 0,01  | 0,00 | 0,01                       | 0,00 | 0,01   | 0,00 | 0,01                        | 0,00 |
| N-C14:0(OH)-Cer     | 0,01  | 0,00 | 0,01                       | 0,00 | 0,00   | 0,00 | 0,00                        | 0,00 |
| N-C14:0(OH)-Cer(2H) | 0,01  | 0,00 | 0,01*                      | 0,00 | 0,01   | 0,00 | 0,01                        | 0,00 |
| N-C14:0-Cer         | 0,01  | 0,00 | 0,01                       | 0,00 | 0,01   | 0,00 | 0,01                        | 0,00 |
| N-C15:0(OH)-Cer     | 0,00  | 0,00 | 0,00                       | 0,00 | 0,01   | 0,00 | 0,01                        | 0,00 |
| N-C15:0-Cer         | 0,04  | 0,00 | 0,04                       | 0,00 | 0,04   | 0,00 | 0,04                        | 0,00 |
| N-C15:0-Cer(2H)     | 0,01  | 0,00 | 0,01                       | 0,00 | 0,01   | 0,00 | 0,01                        | 0,00 |
| N-C16:0(OH)-Cer     | 0,03  | 0,00 | 0,03                       | 0,00 | 0,02   | 0,00 | 0,02                        | 0,00 |
| N-C16:0(OH)-Cer(2H) | 0,01  | 0,00 | 0,02*                      | 0,00 | 0,01   | 0,00 | 0,01                        | 0,00 |
| N-C16:0-Cer         | 0,43  | 0,06 | 0,53                       | 0,08 | 0,37   | 0,04 | 0,42                        | 0,05 |
| N-C16:0-Cer(2H)     | 0,07  | 0,01 | 0,06                       | 0,00 | 0,06   | 0,01 | 0,07                        | 0,01 |
| N-C16:1-Cer         | 0,01  | 0,00 | 0,01*                      | 0,00 | 0,00   | 0,00 | 0,01                        | 0,00 |
| N-C16:1-Cer(2H)     | 0,01  | 0,00 | 0,00                       | 0,00 | 0,01   | 0,00 | 0,00                        | 0,00 |
| N-C17:0(OH)-Cer     | 0,01  | 0,00 | 0,01                       | 0,00 | 0,00   | 0,00 | 0,01                        | 0,00 |
| N-C17:0-Cer         | 0,01  | 0,00 | 0,01                       | 0,00 | 0,01   | 0,00 | 0,01                        | 0,00 |
| N-C18:0(OH)-Cer     | 0,04  | 0,01 | 0,07                       | 0,01 | 0,03   | 0,01 | 0,04                        | 0,01 |
| N-C18:0(OH)-Cer(2H) | 0,01  | 0,00 | 0,01                       | 0,00 | 0,01   | 0,00 | 0,01                        | 0,00 |
| N-C18:0-Cer         | 0,02  | 0,00 | 0,03*                      | 0,00 | 0,02   | 0,00 | 0,02                        | 0,00 |
| N-C18:1-Cer         | 0,01  | 0,00 | 0,01                       | 0,00 | 0,01   | 0,00 | 0,01                        | 0,00 |
| N-C19:0(OH)-Cer     | 0,01  | 0,00 | 0,01                       | 0,00 | 0,01   | 0,00 | 0,00                        | 0,00 |
| N-C19:0-Cer         | 0,01  | 0,00 | 0,01                       | 0,00 | 0,00*  | 0,00 | 0,01                        | 0,00 |
| N-C20:0(OH)-Cer     | 0,15  | 0,05 | 0,25                       | 0,06 | 0,19   | 0,07 | 0,22                        | 0,03 |
| N-C20:0(OH)-Cer(2H) | 0,02  | 0,00 | 0,02                       | 0,01 | 0,02   | 0,01 | 0,03                        | 0,01 |
| N-C20:0-Cer         | 0,03  | 0,00 | 0,03                       | 0,00 | 0,03   | 0,00 | 0,03                        | 0,00 |
| N-C22:0(OH)-Cer     | 0,01  | 0,00 | 0,01                       | 0,00 | 0,01   | 0,00 | 0,01                        | 0,00 |
| N-C22:0-Cer         | 0,01  | 0,00 | 0,01                       | 0,00 | 0,00   | 0,00 | 0,01                        | 0,00 |
| N-C24:0(OH)-Cer     | 0,01  | 0,00 | 0,01                       | 0,00 | 0,01   | 0,00 | 0,01                        | 0,00 |
| N-C24:0-Cer         | 0,01  | 0,00 | 0,01                       | 0,00 | 0,01   | 0,00 | 0,01                        | 0,00 |
| N-C24:0-Cer(2H)     | 0,01  | 0,00 | 0,01                       | 0,00 | 0,01   | 0,00 | 0,00                        | 0,00 |
| N-C24:1-Cer         | 0,02  | 0,00 | 0,02                       | 0,00 | 0,01   | 0,00 | 0,01                        | 0,00 |
| N-C24:1-Cer(2H)     | 0,01  | 0,00 | 0,01                       | 0,00 | 0,01   | 0,00 | 0,01                        | 0,00 |
| N-C25:0-Cer         | 0,00  | 0,00 | 0,00                       | 0,00 | 0,01   | 0,00 | 0,00*                       | 0,00 |
| N-C25:0-Cer(2H)     | 0,01  | 0,00 | 0,01                       | 0,00 | 0,00*  | 0,00 | 0,01                        | 0,00 |
| N-C26:0(OH)-Cer     | 0,00  | 0,00 | 0,01                       | 0,00 | 0,00   | 0,00 | 0,00                        | 0,00 |
| N-C26:0-Cer         | 0,01  | 0,00 | 0,01                       | 0,00 | 0,00   | 0,00 | 0,00                        | 0,00 |
| N-C28:0-Cer         | 0,00  | 0,00 | 0,01                       | 0,00 | 0,00   | 0,00 | 0,00                        | 0,00 |
| N-C7:0(OH)-Cer      | 0,01  | 0,00 | 0,01                       | 0,00 | 0,01   | 0,00 | 0,01                        | 0,00 |
| N-C7:0(OH)-Cer(2H)  | 0,00  | 0,00 | 0,01*                      | 0,00 | 0,01*  | 0,00 | 0,00                        | 0,00 |

|                           |      |      |       |      |      |      |       |      |
|---------------------------|------|------|-------|------|------|------|-------|------|
| <b>N-C7:0-Cer</b>         | 0,00 | 0,00 | 0,01* | 0,00 | 0,00 | 0,00 | 0,00  | 0,00 |
| <b>N-C8:0(OH)-Cer</b>     | 0,00 | 0,00 | 0,01  | 0,00 | 0,01 | 0,00 | 0,01* | 0,00 |
| <b>N-C8:0(OH)-Cer(2H)</b> | 0,00 | 0,00 | 0,00  | 0,00 | 0,01 | 0,00 | 0,01  | 0,00 |
| <b>N-C9:0(OH)-Cer</b>     | 0,00 | 0,00 | 0,01* | 0,00 | 0,01 | 0,00 | 0,01  | 0,00 |
| <b>N-C9:0(OH)-Cer(2H)</b> | 0,00 | 0,00 | 0,00  | 0,00 | 0,01 | 0,00 | 0,01  | 0,00 |

---

\*Significantly different from WT ND, P-values <0,05, Student *t*-test. <sup>§</sup>Significantly different from WT HFD, P-values <0,05, Student *t*-test.

**Supplementary Table 11. LC-MS conditions for the analysis of NAE e 2-acylglycerols in the jejunum of WT, HFD-WT, HFD-Napepld $\Delta$ IEC and HFD-Napepld $\Delta$ IEC plus *A. muciniphila* mice**

| <b>Name</b>          | <b>Ret. Time</b> | <b>MRM</b>      | <b>ISTD used</b> |
|----------------------|------------------|-----------------|------------------|
| Linoleoyl-EA         | 11,034           | 324.30 → 62.05  | Linoleoyl-EA-D4  |
| Linoleoyl-EA-D4      | 11,007           | 328.00 → 66.10  |                  |
| AEA-D8               | 11,113           | 356.40 → 44.15  | AEA-D8           |
| AEA                  | 11,171           | 348.30 → 62.25  |                  |
| Palmitoyl-EA         | 11,563           | 300.30 → 62.10  | Palmitoyl-EA-D4  |
| Palmitoyl-EA-D4      | 11,543           | 304.00 → 62.30  |                  |
| Oleoyl-EA            | 12,162           | 326.00 → 62.05  | Oleoyl-EA-D4     |
| Oleoyl-EA-D4         | 12,136           | 330.20 → 66.10  |                  |
| Stearoyl-EA          | 13,183           | 328.20 → 62.10  | Stearoyl-EA-D3   |
| Stearoyl-EA-D3       | 13,174           | 331.10 → 62.20  |                  |
| 2-Linoleoyl-Glycerol | 11,927           | 355.20 → 263.30 | 1-AG-D5          |
| 1-Linoleoyl-Glycerol | 12,11            | 355.20 → 263.30 | 1-AG-D5          |
| 1-AG-D5              | 12,087           | 384.50 → 287.20 |                  |
| 2-AG                 | 11,984           | 379.30 → 287.25 | 1-AG-D5          |
| 1-AG                 | 12,119           | 379.30 → 287.25 | 1-AG-D5          |
| 2-Palmitoyl Glycerol | 12,5             | 331.10 → 313.25 | 1-AG-D5          |



## Supplementary References

1. Geurts L, *et al.* Adipose tissue NAPE-PLD controls fat mass development by altering the browning process and gut microbiota. *Nature communications* **6**, 6495 (2015).
2. Qiao A, Jin X, Pang J, Moskophidis D, Mivechi NF. The transcriptional regulator of the chaperone response HSF1 controls hepatic bioenergetics and protein homeostasis. *J Cell Biol* **216**, 723-741 (2017).
3. Guo X, Guo H, Zhao L, Zhang YH, Zhang JX. Two predominant MUPs, OBP3 and MUP13, are male pheromones in rats. *Front Zool* **15**, 6 (2018).
