# Supplementary material for: Intestinal epithelial N-acylphosphatidylethanolamine phospholipase D links dietary fat to metabolic adaptations in obesity and steatosis
Source: PubMed Central journal article supplement (PMC6349942; doi:10.1038/s41467-018-08051-7), 2019-01-28
Supplement: 41467_2018_8051_MOESM2_ESM.pdf [file 41467_2018_8051_MOESM2_ESM.pdf]

## Description of Additional Supplementary Files

**File Name:** Supplementary Data 1

**Description:** Relative abundance of the bacterial genera found in the different groups (% of 16S rRNA sequences). Related to Figure 5.
